# Supplementary material
Source: Springer Nature journal article supplement (https://www.springermedizin.de/resource/supplementary/13063_2013_2046_MOESM1_ESM.pdf/9621236)
Supplement: MOESM1 [file 9621236]

**Patients scheduled for open abdominal surgery**

Excluded

**Informed consent**

Excluded

**Randomization n = 50**

**Variable Ventilation**

n = 25

**Conventional Ventilation**

n = 25

**Variable Ventilation**

$V_T = 6 \text{ ml/kg}$

CV  $V_T$  30%

**Conventional Ventilation**

$V_T = 6 \text{ ml/kg}$

CV  $V_T$  0%

Drop out

Drop out

**Follow up**

Days 1, 3, 5,  
day of hospital discharge

Lost to follow up
